# Supplementary material
Source: PubMed Central journal article supplement (PMC5983405)
Supplement: 10.1194_M079251_jlr.M079251-1.pdf [file 10.1194_M079251_jlr.M079251-1.pdf]

Supplementary Table S1: Elution gradient of the kynurenine pathway metabolites HPLC-MS/MS assay. 0.2% formic acid in water and acetonitrile were used as mobile phases A and B, respectively.

| <b>Step No</b> | <b>Time</b> | <b>% Mobile Phase A</b> | <b>% Mobile Phase B</b> | <b>Flow <math>\mu</math>L/min</b> |
|----------------|-------------|-------------------------|-------------------------|-----------------------------------|
| 1              | 0           | 84                      | 15                      | 650                               |
| 2              | 1.2         | 85                      | 15                      | 650                               |
| 3              | 3.2         | 72                      | 28                      | 650                               |
| 4              | 4.5         | 65                      | 35                      | 650                               |
| 5              | 5.2         | 5                       | 95                      | 650                               |
| 6              | 5.5         | 5                       | 95                      | 650                               |
| 7              | 5.6         | 85                      | 15                      | 650                               |
| 8              | 10.5        | 85                      | 15                      | 650                               |
