# Supplementary material
Source: PubMed Central journal article supplement (PMC5983405)
Supplement: 10.1194_M079251_jlr.M079251-2.pdf [file 10.1194_M079251_jlr.M079251-2.pdf]

Supplementary Table S2: Ion transitions and key performance parameters of the kynurenine pathway metabolites HPLC-MS/MS assay.

| Compound                           | Molecular weight [g/mol] | Ion transition [m/z] | Collision energy [eV] | Lower limit of quantitation [ng/mL] | Range of reliable response [ng/mL] | Correlation coefficient of calibration curves $r^2$ (n=3) |
|------------------------------------|--------------------------|----------------------|-----------------------|-------------------------------------|------------------------------------|-----------------------------------------------------------|
| Nicotinamide (NTA)                 | 122.12                   | 122.75 → 79.70       | 18                    | 1                                   | 1-10,000                           | .997                                                      |
| Picolinic acid (PA)                | 123.11                   | 123.75 → 77.70       | 17                    | 1                                   | 1-10,000                           | .998                                                      |
| Quinolinic acid (QA)               | 167.12                   | 167.85 → 77.70       | 20                    | 1                                   | 1-10,000                           | .996                                                      |
| 3-Hydroxykynurenine (3-HK)         | 224.21                   | 225.12 → 109.80      | 18                    | 1                                   | 1-10,000                           | .993                                                      |
| Serotonin (5-HT)                   | 176.21                   | 176.90 → 114.80      | 22                    | 500                                 | 500-10,000                         | .998                                                      |
| Kynurenine (KYN)                   | 208.21                   | 209.05 → 93.70       | 15                    | 1                                   | 1-10,000                           | .996                                                      |
| 3-Hydroxyanthranilic acid (3HAA)   | 153.14                   | 153.85 → 79.75       | 25                    | 10                                  | 10-10,000                          | .998                                                      |
| Tryptophan (TRP)                   | 204.23                   | 205.10 → 145.80      | 18                    | 50                                  | 50-10,000                          | .998                                                      |
| Xanthurenic acid (XT)              | 205.17                   | 206.05 → 131.80      | 27                    | 5                                   | 5-10,000                           | .999                                                      |
| Kynurenic acid (KA)                | 189.17                   | 190.00 → 143.85      | 18                    | 1                                   | 1-5,000                            | .999                                                      |
| 5-Hydroxyindoleacetic acid (5HIAA) | 191.18                   | 192.00 → 146.00      | 15                    | 500                                 | 500-10,000                         | .996                                                      |
| Anthranilic acid (AA)              | 137.14                   | 137.82 → 64.75       | 25                    | 1                                   | 1-10,000                           | .999                                                      |
