# Supplementary material
Source: PubMed Central journal article supplement (PMC5983405)
Supplement: 10.1194_M079251_jlr.M079251-3.pdf [file 10.1194_M079251_jlr.M079251-3.pdf]

Supplementary Table S3: P-values for comparison of metabolite levels by two-way ANOVA. For comparisons between groups Tukey's post hoc tests were used, the results are presented in the figures in the main text.

| Panel       | Matrix      | Metabolite                                | Diet effect | Access effect | Diet effect x access effect |
|-------------|-------------|-------------------------------------------|-------------|---------------|-----------------------------|
| A           | Plasma      | Pyridoxal                                 | 0.706       | <0.001        | 0.322                       |
|             | Plasma      | Isopyridoxal                              | 0.423       | 0.001         | 0.423                       |
|             | Plasma      | Arachidonoyl serotonin                    | <0.001      | 0.712         | 0.024                       |
|             | Plasma      | 3-Hydroxykynurenine                       | <0.001      | 0.844         | 0.017                       |
|             | Plasma      | Picolinic acid                            | 0.043       | 0.004         | 0.093                       |
|             | Plasma      | 2,8-Dihydroxyquinoline-beta-D-glucuronide | 0.009       | 0.159         | 0.067                       |
|             | Plasma      | N-Methylnicotinamide                      | 0.131       | <0.001        | 0.053                       |
|             | B           | Plasma                                    | Tryptophan  | 0.000         | 0.183                       |
| Plasma      |             | 5-Hydroxyindoleacetic acid                | <0.001      | <0.001        | <0.001                      |
| Plasma      |             | Kynurenine                                | <0.001      | <0.001        | <0.001                      |
| Plasma      |             | Kynurenic acid                            | <0.001      | <0.001        | <0.001                      |
| Plasma      |             | 3-Hydroxykynurenine                       | 0.044       | 0.140         | 0.360                       |
| Plasma      |             | Xanthurenic acid                          | <0.001      | 0.220         | 0.006                       |
| Plasma      |             | Picolinic acid                            | <0.001      | 0.007         | 0.006                       |
| Plasma      |             | Quinolinic acid                           | <0.001      | 0.070         | <0.001                      |
| Plasma      |             | Nicotinamide                              | 0.896       | 0.509         | 0.219                       |
| Hippocampus |             | Tryptophan                                | 0.123       | 0.749         | 0.212                       |
| Hippocampus |             | Kynurenine                                | <0.001      | 0.005         | 0.002                       |
| Hippocampus |             | Xanthurenic acid                          | 0.579       | 0.543         | 0.934                       |
| C           | Hippocampus | Picolinic acid                            | 0.113       | 0.217         | 0.476                       |
|             | Hippocampus | Nicotinamide                              | 0.897       | 0.030         | 0.903                       |
