# Supplementary material
Source: PubMed Central journal article supplement (PMC5983405)
Supplement: 10.1194_M079251_jlr.M079251-4.pdf [file 10.1194_M079251_jlr.M079251-4.pdf]

Supplementary Table S4: P-values for comparison of metabolite levels by two-way ANOVA. For comparisons between groups Tukey's post hoc tests were used, the results are presented in the figures in the main text.

| <b>Matrix</b> | <b>Ratio</b> | <b>Diet effect</b> | <b>Access effect</b> | <b>Diet effect x access effect</b> |
|---------------|--------------|--------------------|----------------------|------------------------------------|
| Plasma        | KA/QA        | <0.001             | 0.003                | <0.001                             |
| Plasma        | KA/3-HK      | <0.001             | <0.001               | 0.001                              |
| Plasma        | KYN/3-HK     | <0.001             | <0.001               | 0.001                              |
| Plasma        | KYN/TRP      | 0.003              | <0.001               | 0.007                              |
| Hippocampus   | KYN/TRP      | 0.001              | 0.006                | 0.004                              |
